**CORRECTION**

## What a jerk: prey engulfment revealed by high-rate, super-cranial accelerometry on a harbour seal (*Phoca vitulina*)

**Kristina S. Ydesen, Danuta M. Wisniewska, Janni D. Hansen, Kristian Beedholm, Mark Johnson and Peter T. Madsen**

There was an error published in *J. Exp. Biol.* **217**, 2239-2243. Eqn 1 in Materials and methods was incorrect. The correct version of the equation is given below.

$$\text{Jerk} = fs * \sqrt{\text{sum}(\text{diff}(A).^2)} \quad (1)$$

The authors apologise for any inconvenience that this may have caused.
